# Supplementary material for: Interaction of LARP4 to filamin A mechanosensing domain regulates cell migrations
Source: Front Cell Dev Biol. 2023 Apr 24;11:1152109. doi: 10.3389/fcell.2023.1152109 (PMC10164935; doi:10.3389/fcell.2023.1152109)
Supplement: Supplementary file 8 [file Table1.XLSX]

## Sheet: LARP4-KD RNAseq KmeansEnrichmen
Cluster	adj.Pval	nGenes	Pathways	Genes
A	1.12395e-09	74	Animal organ morphogenesis	LAMA3 DMRT3 SDK2 GLI2 NTN4 EDN1 WNT11 WHRN TAB1 EYA1 SFRP1 DNAH11 ASPN ACTA2 PITX3 HOXB6 NECTIN1 GLI1 VDR GHR HES1 EFEMP1 SDC1 NR5A2 PROX1 ONECUT2 TGFB3 NKX2-3 MSX2 INHBA RUNX2 SOX9 BMP2 LIF ALDH1A2 FST AGT MYC LBX1 NAB1 BMPR1B SLC39A3 LHX9 GDF7 SPEF2 MMP16 EOMES TGFBR2 HAND2 DLC1 BMP1 GBX2 AR ZFPM2 S1PR1 INSR RARG MST1 PHOSPHO1 FZD4 FOXC2 FOXE1 ALDH1A3 FLRT2 ROR1 IFT140 STK40 NTNG2 SULF2 PDGFA T…
A	1.9444e-08	167	Animal organ development	CRLF1 TEAD3 ST3GAL1 TNFRSF1B GAB2 RTN4R EPHA3 LAMA3 GPC1 DMRT3 SDK2 BCL3 GLI2 NTN4 PLXNA2 GPR137B EDN1 COL19A1 OXCT1 WNT11 PTHLH TESC WHRN CYP26A1 JAK2 CBY1 TAB1 TRPC4AP RASSF2 FLT1 FA2H EYA1 SFRP1 SMG9 DNAH11 PTPRZ1 ASPN ACTA2 PITX3 PBLD HOXB6 HLF NECTIN1 LIN7A GLI1 VDR GHR NME5 HES1 EFEMP1 SDC1 EPAS1 EPHA4 NR5A2 RGS4 PTCH2 PLPPR4 PROX1 MYB ONECUT2 TGFB3 ESRRB NKX2-3 MSX2 SLC10A7 INHBA GLIPR2 PD…
A	2.92507e-08	43	Skeletal system development	TLL1 GLI2 EDN1 COL19A1 WNT11 PTHLH RASSF2 EYA1 SFRP1 HOXB6 VDR GHR EFEMP1 TGFB3 MSX2 SLC10A7 RUNX2 SOX9 BMP2 HOXD1 HAPLN2 FST NAB1 BMPR1B SLC39A3 SPEF2 MMP16 TGFBR2 HAND2 ATP7A BMP1 COL3A1 RARG PHOSPHO1 FOXC2 SPNS2 AMER1 IFT140 SULF2 PAPSS2 TGM2 RIPPLY2 GDF10
A	2.92507e-08	132	Anatomical structure morphogenesis	STAB1 TNFRSF1B GAB2 RTN4R EPHA3 LAMA3 LZTS1 GPC1 ADCK1 DMRT3 NGEF SDK2 BCL3 EPHA8 GLI2 NTN4 PLXNA2 EDN1 STRADB WNT11 B4GALT1 NRCAM WHRN CARD10 NEFH TAB1 SRPX2 FLT1 FBXO31 EYA1 SFRP1 DNAH11 PTPRZ1 ASPN ACTA2 PITX3 HOXB6 NECTIN1 GLI1 VDR GHR HES1 EFEMP1 SDC1 TRAK2 EPAS1 EPHA4 NR5A2 GBP1 PLPPR4 PROX1 ONECUT2 TGFB3 NKX2-3 MSX2 DUSP4 INHBA RUNX2 SOX21 SOX9 BMP2 LIF ALDH1A2 DCLK1 FST FHOD3 AGT MYC LBX1…
A	2.92507e-08	109	Tissue development	CRLF1 EPHA3 LAMA3 GPC1 GLI2 NTN4 PLXNA2 EDN1 COL19A1 OXCT1 WNT11 B4GALT1 PTHLH WHRN JAK2 CBY1 TRPC4AP FA2H EYA1 SFRP1 ASPN ACTA2 PITX3 PBLD HLF NECTIN1 AMBRA1 GLI1 VDR GHR HES1 EFEMP1 SDC1 EPHA4 NR5A2 RGS4 PTCH2 PROX1 ONECUT2 TGFB3 NKX2-3 MSX2 DUSP4 INHBA GLIPR2 HOXC11 RUNX2 SOX21 SOX9 BMP2 TNFRSF19 LIF ALDH1A2 HAPLN2 FST FHOD3 AGT MYC LBX1 NAB1 BMPR1B BMP2K CYP1A1 DUSP10 GDF7 VAX1 TAGLN SEMA3D K…
A	1.65464e-07	185	Cell differentiation	TEAD3 ST3GAL1 TNFRSF1B GAB2 TLL1 RTN4R EPHA3 LAMA3 LZTS1 GPC1 DMRT3 NGEF SDK2 BCL3 EPHA8 GLI2 NTN4 PLXNA2 NMRK2 GPR137B EDN1 COL19A1 WNT11 B4GALT1 PTHLH TESC NRCAM WHRN JAK2 CBY1 NEFH RASSF2 FLT1 FA2H FBXO31 EYA1 SFRP1 PTPRZ1 ACTA2 PITX3 PBLD HLF PANX1 NECTIN1 AMBRA1 GLI1 VDR MAK GHR NME5 HES1 EFEMP1 SDC1 TRAK2 EPAS1 EPHA4 NR5A2 RGS4 GBP1 PTCH2 PLPPR4 PROX1 MYB ARMC2 ONECUT2 TGFB3 ESRRB FKBP1B NK…
A	2.16919e-07	105	Cell development	TNFRSF1B GAB2 RTN4R EPHA3 LAMA3 LZTS1 GPC1 NGEF EPHA8 GLI2 NTN4 PLXNA2 EDN1 B4GALT1 PTHLH NRCAM WHRN JAK2 NEFH FA2H FBXO31 SFRP1 PTPRZ1 ACTA2 PITX3 PANX1 NECTIN1 NME5 HES1 SDC1 TRAK2 EPAS1 EPHA4 RGS4 GBP1 PLPPR4 PROX1 MYB ARMC2 ONECUT2 FKBP1B RUNX2 SOX9 BMP2 LIF ALDH1A2 HAPLN2 DCLK1 TSPAN2 FHOD3 AGT MYC BMPR1B LHX9 DUSP10 GDF7 TMEM108 EPHA5 VAX1 GFRA1 SPEF2 MERTK SEMA3D FMN2 NBEAL2 ZSWIM5 KBTBD8 …
A	2.16919e-07	187	Cellular developmental process	TEAD3 ST3GAL1 TNFRSF1B GAB2 TLL1 RTN4R EPHA3 LAMA3 LZTS1 GPC1 DMRT3 NGEF SDK2 BCL3 EPHA8 GLI2 NTN4 PLXNA2 NMRK2 GPR137B EDN1 COL19A1 WNT11 B4GALT1 PTHLH TESC NRCAM WHRN JAK2 CBY1 NEFH RASSF2 FLT1 FA2H FBXO31 EYA1 SFRP1 PTPRZ1 ACTA2 PITX3 PBLD HLF PANX1 NECTIN1 AMBRA1 GLI1 FOXM1 VDR MAK GHR NME5 HES1 EFEMP1 SDC1 TRAK2 EPAS1 EPHA4 NR5A2 RGS4 GBP1 PTCH2 PLPPR4 PROX1 MYB ARMC2 ONECUT2 TGFB3 ESRRB FKB…
A	5.81335e-07	37	Gland development	GLI2 NTN4 WNT11 JAK2 FA2H SFRP1 GLI1 VDR HES1 PROX1 ONECUT2 TGFB3 NKX2-3 SOX9 BMP2 ALDH1A2 MYC CYP1A1 TNFRSF11A GDF7 EAF2 TGFBR2 HAND2 ATP7A AR ONECUT1 FOXB1 RARG INSM1 MST1 FOXE1 ALDH1A3 SULF2 PDGFA TGM2 MAFB CEBPA
A	9.14216e-07	116	Nervous system development	TEAD3 TNFRSF1B GAB2 RTN4R EPHA3 LAMA3 LZTS1 GPC1 DMRT3 NGEF SDK2 EPHA8 GLI2 NTN4 PLXNA2 OXCT1 WNT11 NRCAM WHRN JAK2 CBY1 NEFH SRPX2 FA2H FBXO31 ACSBG1 EYA1 SFRP1 SMG9 DNAH11 PTPRZ1 PITX3 NECTIN1 AMBRA1 GLI1 NME5 ST8SIA4 HES1 TRAK2 EPHA4 RGS4 PLPPR4 PROX1 MYB ONECUT2 FKBP1B INHBA RUNX2 SOX9 BMP2 LIF HOXD1 ALDH1A2 NPAS1 HAPLN2 DCLK1 TSPAN2 AGT RAPGEF5 MYC LBX1 NAB1 BMPR1B LHX9 DUSP10 GDF7 TMEM108 E…
A	9.14216e-07	83	Generation of neurons	TEAD3 TNFRSF1B GAB2 RTN4R EPHA3 LAMA3 LZTS1 GPC1 DMRT3 NGEF SDK2 EPHA8 GLI2 NTN4 PLXNA2 WNT11 NRCAM WHRN JAK2 NEFH FBXO31 EYA1 SFRP1 PTPRZ1 PITX3 NECTIN1 HES1 TRAK2 EPHA4 PLPPR4 PROX1 MYB ONECUT2 FKBP1B INHBA RUNX2 SOX9 BMP2 LIF HOXD1 ALDH1A2 DCLK1 TSPAN2 AGT MYC LBX1 BMPR1B LHX9 DUSP10 GDF7 TMEM108 EPHA5 VAX1 GFRA1 SEMA3D ZSWIM5 HAND2 ATP7A SAMD14 GBX2 COL3A1 SPRY3 S1PR1 NPTX1 FOXB1 NDNF INSM1 F…
A	1.4084e-06	87	Neurogenesis	TEAD3 TNFRSF1B GAB2 RTN4R EPHA3 LAMA3 LZTS1 GPC1 DMRT3 NGEF SDK2 EPHA8 GLI2 NTN4 PLXNA2 WNT11 NRCAM WHRN JAK2 NEFH FA2H FBXO31 EYA1 SFRP1 PTPRZ1 PITX3 NECTIN1 HES1 TRAK2 EPHA4 PLPPR4 PROX1 MYB ONECUT2 FKBP1B INHBA RUNX2 SOX9 BMP2 LIF HOXD1 ALDH1A2 DCLK1 TSPAN2 AGT MYC LBX1 NAB1 BMPR1B LHX9 DUSP10 GDF7 TMEM108 EPHA5 VAX1 GFRA1 SEMA3D ZSWIM5 HAND2 ATP7A SAMD14 GBX2 COL3A1 SPRY3 S1PR1 NPTX1 FOXB1 ND…
A	4.00103e-06	35	Embryonic organ development	TEAD3 GLI2 EDN1 WNT11 WHRN EYA1 HOXB6 GLI1 HES1 EFEMP1 EPAS1 PROX1 TGFB3 RUNX2 SOX9 LIF ALDH1A2 LBX1 SLC39A3 MMP16 EOMES TGFBR2 HAND2 GBX2 ZFPM2 RARG PIFO FOXC2 FOXE1 ALDH1A3 IFT140 PDGFA MAFB CEBPA GATA4
A	4.00103e-06	23	Respiratory system development	GLI2 WNT11 TAB1 GLI1 HES1 EPAS1 PROX1 TGFB3 SOX9 LIF ALDH1A2 SPEF2 TGFBR2 ATP7A KCNAB1 ZFPM2 RARG MSC ALDH1A3 STK40 MME PDGFA CEBPA
A	4.07456e-06	17	Gland morphogenesis	GLI2 NTN4 SFRP1 GLI1 VDR PROX1 TGFB3 NKX2-3 SOX9 GDF7 TGFBR2 AR RARG MST1 SULF2 PDGFA TGM2
C	0.00149762	50	Anatomical structure formation involved in morphogenesis	ISL1 TYMP SIRT6 MMP15 PTN C5 NKX3-2 BCL6 ACVR1 CD160 TNFAIP3 LDB3 C3 ITGB4 GSC VAV3 GPNMB CYP1B1 SHROOM3 ENPEP LEF1 COL2A1 ITGAX NKD1 SDK1 IL18 FZD5 ADAMTS9 FRS2 SYNPO2L WDR72 GDNF IL12A ROR2 WNT10B HOPX HPSE CDK5R1 HES7 ZFPM1 EPHB3 ZP3 ADA C5AR1 MAP3K3 ANG AQP1 SHANK3 TGFBR3L LHX1
C	0.00416569	92	Anatomical structure morphogenesis	PKD1 SEMA3B ISL1 TYMP CUL7 LAMC2 XRCC1 SIRT6 EPHA6 MYO15A BAMBI PALM SPEF1 MMP15 PTN HOXA2 C5 KANK1 SLC6A4 NKX3-2 BCL6 ACVR1 CD160 TNFAIP3 LDB3 SSUH2 C3 HOXD3 UNC13A NFATC1 ITGB4 RIN2 GSC VAV3 ANKRD6 GPNMB CYP1B1 SHROOM3 ENPEP LEF1 COL2A1 FGF7 ITGAX TGFB1I1 NKD1 TUFT1 SYT2 SDK1 BIN3 NCAM1 FERMT3 IL18 PTPRO DAB2 FGD5 LHX8 FZD5 NPPC NKX6-1 ADAMTS9 FRS2 APBB1 SYNPO2L WDR72 GDNF IL12A ROR2 WNT10B HOP…
C	0.00518404	76	Movement of cell or subcellular component	SEMA3B ISL1 DNAH5 KITLG LAMC2 EPHA6 KIF9 MYO15A BAMBI RIN3 SPEF1 SYDE1 PTN HOXA2 C5 KANK1 BCL6 FGF12 ACVR1 TNFAIP3 ACVR1C KCNJ2 GPR18 KNSTRN LRRC6 QRICH2 ITGB4 RIN2 VAV3 GPNMB CYP1B1 ENPEP LEF1 MAPK8IP3 FGF7 ITGAX NKD1 BIN3 TTC12 NCAM1 FERMT3 PTPRO DAB2 SPAG17 DYNC1I1 CXCR5 KCNJ3 NKX6-1 ADAMTS9 SLC9B1 MST1R FRS2 PIP5KL1 CORO6 ULK4 GDNF IL12A ROR2 PTAFR TTLL6 CORO1B TNFRSF10D CDK5R1 EPHB3 CSF1 ZP3…
C	0.00552558	6	Positive regulation of vascular endothelial growth factor production	ISL1 C5 C3 CYP1B1 HPSE C5AR1
C	0.00552558	68	Locomotion	SEMA3B ISL1 TYMP DNAH5 KITLG LAMC2 EPHA6 BAMBI RIN3 SPEF1 SYDE1 PTN HOXA2 C5 KANK1 ACVR1 TNFAIP3 ACVR1C GPR18 KNSTRN LRRC6 QRICH2 ITGB4 RIN2 VAV3 GPNMB CYP1B1 ENPEP LEF1 FGF7 ITGAX NKD1 BIN3 TTC12 NCAM1 FERMT3 PTPRO DAB2 CXCR5 NKX6-1 ADAMTS9 SLC9B1 MST1R FRS2 PIP5KL1 CORO6 ULK4 GDNF IL12A ROR2 PTAFR CORO1B TNFRSF10D CDK5R1 EPHB3 CSF1 ZP3 LRRK2 EVL ADA C5AR1 CFAP43 MAP3K3 ANG SHANK3 TGFBR3L PECAM1…
C	0.00552558	62	Cell motility	SEMA3B ISL1 DNAH5 KITLG LAMC2 BAMBI RIN3 SPEF1 SYDE1 PTN C5 KANK1 ACVR1 TNFAIP3 ACVR1C GPR18 KNSTRN LRRC6 QRICH2 ITGB4 RIN2 VAV3 GPNMB CYP1B1 ENPEP LEF1 FGF7 ITGAX NKD1 BIN3 TTC12 FERMT3 PTPRO DAB2 CXCR5 NKX6-1 ADAMTS9 SLC9B1 MST1R PIP5KL1 CORO6 ULK4 GDNF IL12A ROR2 PTAFR CORO1B TNFRSF10D CDK5R1 EPHB3 CSF1 ZP3 LRRK2 EVL ADA C5AR1 CFAP43 MAP3K3 ANG TGFBR3L PECAM1 LHX1
C	0.00552558	62	Localization of cell	SEMA3B ISL1 DNAH5 KITLG LAMC2 BAMBI RIN3 SPEF1 SYDE1 PTN C5 KANK1 ACVR1 TNFAIP3 ACVR1C GPR18 KNSTRN LRRC6 QRICH2 ITGB4 RIN2 VAV3 GPNMB CYP1B1 ENPEP LEF1 FGF7 ITGAX NKD1 BIN3 TTC12 FERMT3 PTPRO DAB2 CXCR5 NKX6-1 ADAMTS9 SLC9B1 MST1R PIP5KL1 CORO6 ULK4 GDNF IL12A ROR2 PTAFR CORO1B TNFRSF10D CDK5R1 EPHB3 CSF1 ZP3 LRRK2 EVL ADA C5AR1 CFAP43 MAP3K3 ANG TGFBR3L PECAM1 LHX1
C	0.00552558	4	Regulation of synaptic vesicle cycle	RAPGEF4 BSN CDK5R1 PRKAR1B
C	0.00666273	44	Animal organ morphogenesis	PKD1 ISL1 LAMC2 SIRT6 MYO15A SPEF1 PTN HOXA2 SLC6A4 NKX3-2 ACVR1 TNFAIP3 SSUH2 HOXD3 ITGB4 GSC ANKRD6 LEF1 COL2A1 FGF7 ITGAX NKD1 TUFT1 SDK1 DAB2 LHX8 FZD5 NPPC NKX6-1 FRS2 SYNPO2L WDR72 GDNF ROR2 WNT10B ZFPM1 CSF1 LCTL LRRK2 EVL LHFPL5 AQP1 SHANK3 LHX1
C	0.00682246	56	Cell migration	SEMA3B ISL1 KITLG LAMC2 BAMBI RIN3 SPEF1 SYDE1 PTN C5 KANK1 ACVR1 TNFAIP3 ACVR1C GPR18 KNSTRN ITGB4 RIN2 VAV3 GPNMB CYP1B1 ENPEP LEF1 FGF7 ITGAX NKD1 BIN3 FERMT3 PTPRO DAB2 CXCR5 NKX6-1 ADAMTS9 MST1R PIP5KL1 CORO6 ULK4 GDNF IL12A ROR2 PTAFR CORO1B TNFRSF10D CDK5R1 EPHB3 CSF1 ZP3 LRRK2 EVL ADA C5AR1 MAP3K3 ANG TGFBR3L PECAM1 LHX1
C	0.00682246	41	Regulation of anatomical structure morphogenesis	SEMA3B ISL1 CUL7 SIRT6 BAMBI PALM SPEF1 PTN C5 KANK1 BCL6 CD160 TNFAIP3 C3 UNC13A ANKRD6 GPNMB CYP1B1 SHROOM3 FGF7 ITGAX NKD1 SYT2 DAB2 FGD5 FZD5 ADAMTS9 FRS2 GDNF ROR2 CORO1B CDK5R1 EPHB3 CSF1 C15ORF62 LRRK2 ADA C5AR1 AQP1 SHANK3 LHX1
C	0.00809871	26	Angiogenesis	ISL1 TYMP SIRT6 PTN C5 ACVR1 CD160 TNFAIP3 C3 VAV3 GPNMB CYP1B1 ENPEP LEF1 ITGAX IL18 FZD5 ADAMTS9 IL12A HPSE EPHB3 C5AR1 MAP3K3 ANG AQP1 TGFBR3L
C	0.00809871	83	Regulation of developmental process	SEMA3B ISL1 TYMP PARP3 CUL7 KITLG CLDN18 MBNL3 SIRT6 BAMBI PALM SPEF1 SYDE1 PTN HOXA2 C5 KANK1 SLC6A4 NKX3-2 BCL6 ACVR1 CD160 TNFAIP3 C3 HOXD3 CDH15 UNC13A NFATC1 RIN2 IL15RA ANKRD6 GPNMB ADAMTS7 CYP1B1 SHROOM3 LEF1 MAPK8IP3 FGF7 SH3GL3 ITGAX TGFB1I1 NKD1 SYT2 SDK1 IL18 DAB2 FGD5 TAF6L BRINP3 FZD5 NPPC NKX6-1 ADAMTS9 CGAS FRS2 GDNF ROR2 WNT10B FOS HOPX CORO1B HPSE LRRN3 ADAMTS20 GPR137 CDK5R1 HES…
C	0.00899572	32	Vasculature development	PKD1 ISL1 TYMP CUL7 SIRT6 PTN C5 ACVR1 CD160 TNFAIP3 C3 NFATC1 RIN2 VAV3 GPNMB CYP1B1 ENPEP LEF1 ITGAX IL18 FZD5 ADAMTS9 IL12A HPSE EPHB3 C5AR1 SLC2A10 MAP3K3 ANG AQP1 TGFBR3L PECAM1
C	0.00906645	31	Blood vessel development	PKD1 ISL1 TYMP CUL7 SIRT6 PTN C5 ACVR1 CD160 TNFAIP3 C3 RIN2 VAV3 GPNMB CYP1B1 ENPEP LEF1 ITGAX IL18 FZD5 ADAMTS9 IL12A HPSE EPHB3 C5AR1 SLC2A10 MAP3K3 ANG AQP1 TGFBR3L PECAM1
